# Supplementary material
Source: publisher site journal article supplement (https://www.dovepress.com/article/564788)
Supplement: Supplementary file 1 [file 564788_Supplementary%20tables.docx]

**Supplementary table 1** Comparison of skin hydration, TEWL, proportion of red area and a* value between the two facial sides at different time points.

| baseline | Treated side | | | | | | Control side | | | | | | P1 | P2 | P3 | P4 | P5 | P6 |
| --- | --- | --- | --- | --- | --- | --- | --- | --- | --- | --- | --- | --- | --- | --- | --- | --- | --- | --- |
| baseline | day 0 post-IPL | Day 1 | Day 3 | Day 7 | Day 28 | baseline | day 0 post-IPL | Day 1 | Day 3 | Day 7 | Day 28 |
| TEWL | 22.31±6.90 | 24.80±7.48 | 22.84±8.26 | 20.47±5.15 | 17.96±3.95 | 16.56±3.71 | 22.23±6.86 | 24.54±6.77 | 24.12±7.57 | 21.85±5.44 | 20.98±5.98 | 19.16±4.12 | 0.852 | 0.594 | 0.190 | 0.019 | <0.001 | <0.001 |
| Hydration index | 66.10±28.53 | 85.40±26.63 | 95.33±14.89 | 84.18±18.31 | 92.85±17.14 | 96.11±15.66 | 68.60±31.25 | 84.13±27.93 | 90.73±16.22 | 75.07±23.33 | 79.44±19.43 | 88.83±19.12 | 0.096 | 0.415 | 0.056 | <0.001 | <0.001 | 0.001 |
| Red area | 31.07±5.44 | 33.89±5.46 | 33.45±6.57 | 30.29±6.63 | 31.14±5.97 | 31.28±5.41 | 31.20±5.60 | 33.67±6.19 | 33.03±6.97 | 30.87±6.14 | 31.90±6.56 | 31.21±6.23 | 0.775 | 0.460 | 0.626 | 0.035 | 0.316 | 0.360 |
| a* value | 23.79±4.52 | 26.30±4.87 | 25.41±5.08 | 22.96±4.81 | 23.36±4.34 | 23.26±4.28 | 24.34±5.28 | 26.04±5.79 | 25.50±5.58 | 23.99±5.16 | 24.78±5.38 | 23.95±5.33 | 0.134 | 0.692 | 0.889 | 0.067 | 0.032 | 0.106 |

**Abbreviations:** P1, 𝑃-value at baseline (vs. control); P2, 𝑃-value at day 0 (vs. control); P3, 𝑃-value at day 1 (vs. control); P4, 𝑃-value at day 3 (vs. control); P5, 𝑃-value at day 7 (vs. control); P6, 𝑃-value at day 28 post-IPL (vs. control). A 𝑃-value < .05 was considered statistically significant.

**Supplementary table 2** Comparison of sebum level, melanin index, L* value, b* value, and ITA°between the two facial sides at different time points.

| parameters | Treated side | | | Control side | | | P1 | P2 | P3 |
| --- | --- | --- | --- | --- | --- | --- | --- | --- | --- |
| Baseline | D7 | D28 | Baseline | D7 | D28 |
| Sebum | 59.81±71.73 | 36.91±38.87 | / | 58.63±70.58 | 45.97±64.86 | / | 0.719 | 0.717 | / |
| L* value | 63.43±2.74 | 63.55±3.04 | 63.79±2.60 | 63.00±2.76 | 63.42±2.79 | 63.46±2.70 | 0.222 | 0.691 | 0.401 |
| b* value | 17.88±2.18 | 17.40±1.99 | 17.09±2.25 | 17.82±1.97 | 17.74±1.84 | 17.07±2.40 | 0.845 | 0.191 | 0.941 |
| ITA° | 36.86±7.75 | 37.68±7.83 | 38.84±7.26 | 36.01±7.50 | 36.92±7.10 | 38.20±7.32 | 0.203 | 0.285 | 0.333 |
| Gloss value | 66.84±8.73 | 73.64±8.44 | 72.95±7.74 | 67.09±8.48 | 69.75±7.23 | 69.90±7.88 | 0.795 | 0.001 | 0.001 |
| Melanin index | 174.47±34.84 | 165.72±34.98 | 160.95±34.57 | 170.56±33.32 | 160.90±28.91 | 160.50±30.60 | 0.403 | 0.248 | 0.917 |

Abbreviations: P1, 𝑃-value at baseline (vs. control); P2, 𝑃-value at day 7 (vs. control); P3, 𝑃-value at day 28 (vs. control). 𝑃 < .05 was considered statistically significant
